# Supplementary material for: Co-transplantation of tonsil-derived mesenchymal stromal cells in bone marrow transplantation promotes thymus regeneration and T cell diversity following cytotoxic conditioning
Source: PubMed Central journal article supplement — Int J Mol Med. 2020 Jun 24;46(3):1166–74. doi: 10.3892/ijmm.2020.4657 (PMC7387097; doi:10.3892/ijmm.2020.4657), 2020-06-24
Supplement: Supplementary_Data.pdf [file Supplementary_Data.pdf]

Figure S1. RNA was extracted from experimental mice's thymus on (A) day 3 and (B) day 10 post-BMT, and mouse *Fgf7* and *Flt3l* gene expression were analyzed by RT-qPCR. The relative fold expression and changes were calculated using the  $2^{-\Delta\Delta C_q}$  method (1). (C) On day 3 and (D) day 10 after post-BMT, and human *FGF7* and *FLT3L* gene expression were analyzed by RT-qPCR. Data are presented as the mean  $\pm$  standard error (one-way ANOVA followed by Sidak's multiple comparisons test; \* $P < 0.05$ , \*\* $P < 0.01$  and \*\*\* $P < 0.001$  as indicated).

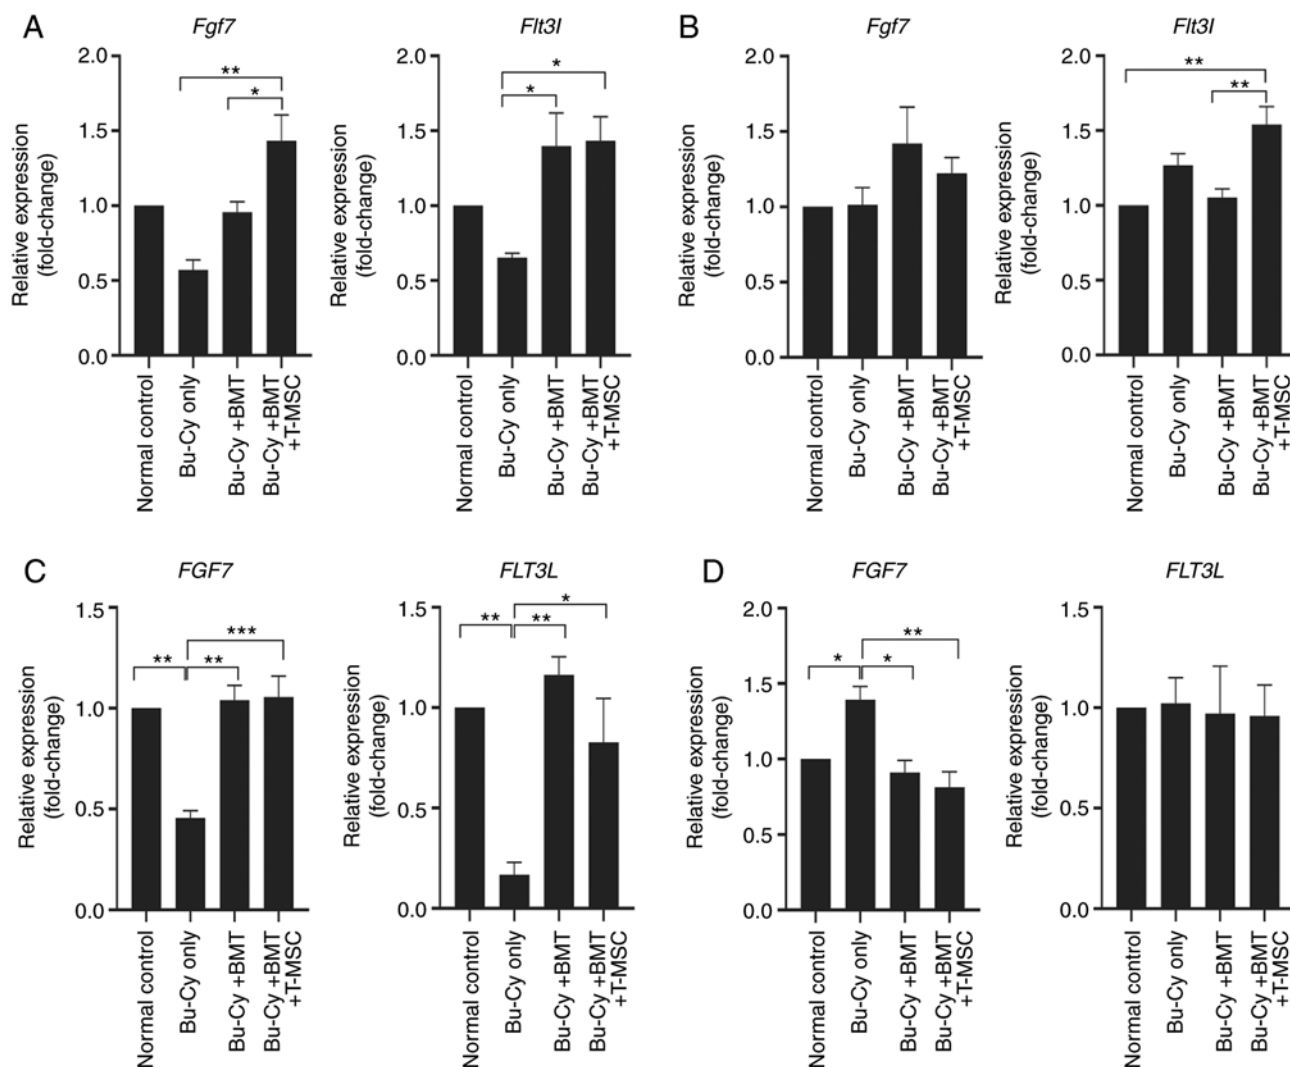

## Reference

1. Livak and Schmittgen: Analysis of relative gene expression data using real-time quantitative PCR and the  $2^{-\Delta\Delta C_q}$  method. *Methods* 25: 402-408, 2001.
